# Supplementary material
Source: PubMed Central journal article supplement (PMC3636179)
Supplement: NIHMS454997-supplement-01.pdf [file NIHMS454997-supplement-01.pdf]

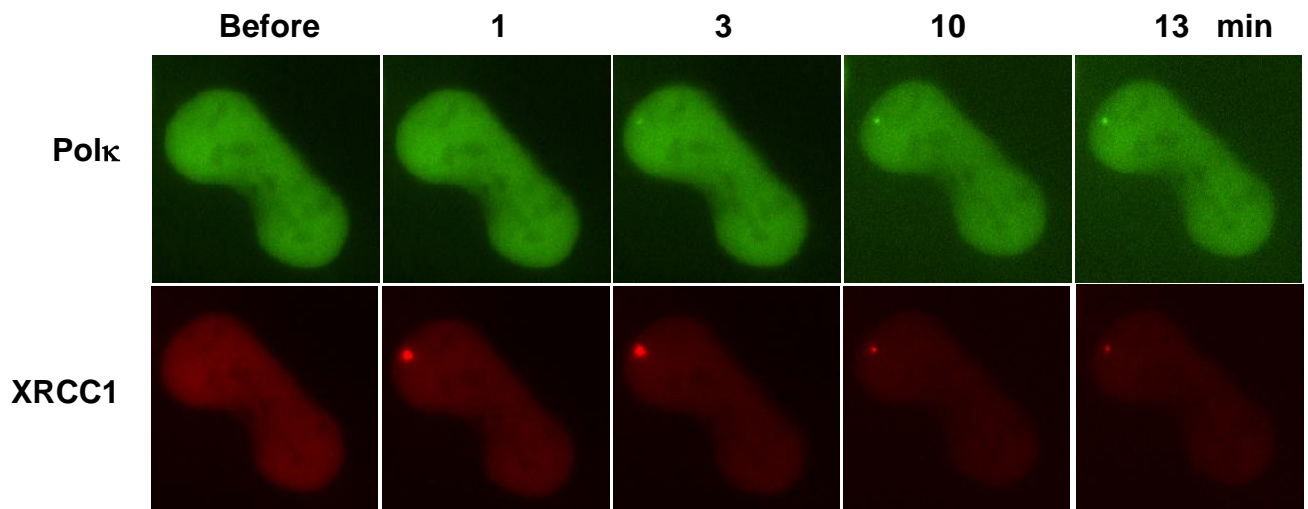

Supplementary Fig. 1. Recruitment of GFP-Pol $\kappa$  and DsRed-XRCC1 to DNA damage induced by a 365-nm UVA-laser. Nuclei of U2OS cells expressing GFP-Pol $\kappa$  and DsRed-XRCC1 were irradiated as described in 'Materials and Methods' section. The images were recorded before and at the indicated time points after micro-irradiation.
