# Supplementary material
Source: PubMed Central journal article supplement (PMC3636179)
Supplement: NIHMS454997-supplement-02.pdf [file NIHMS454997-supplement-02.pdf]

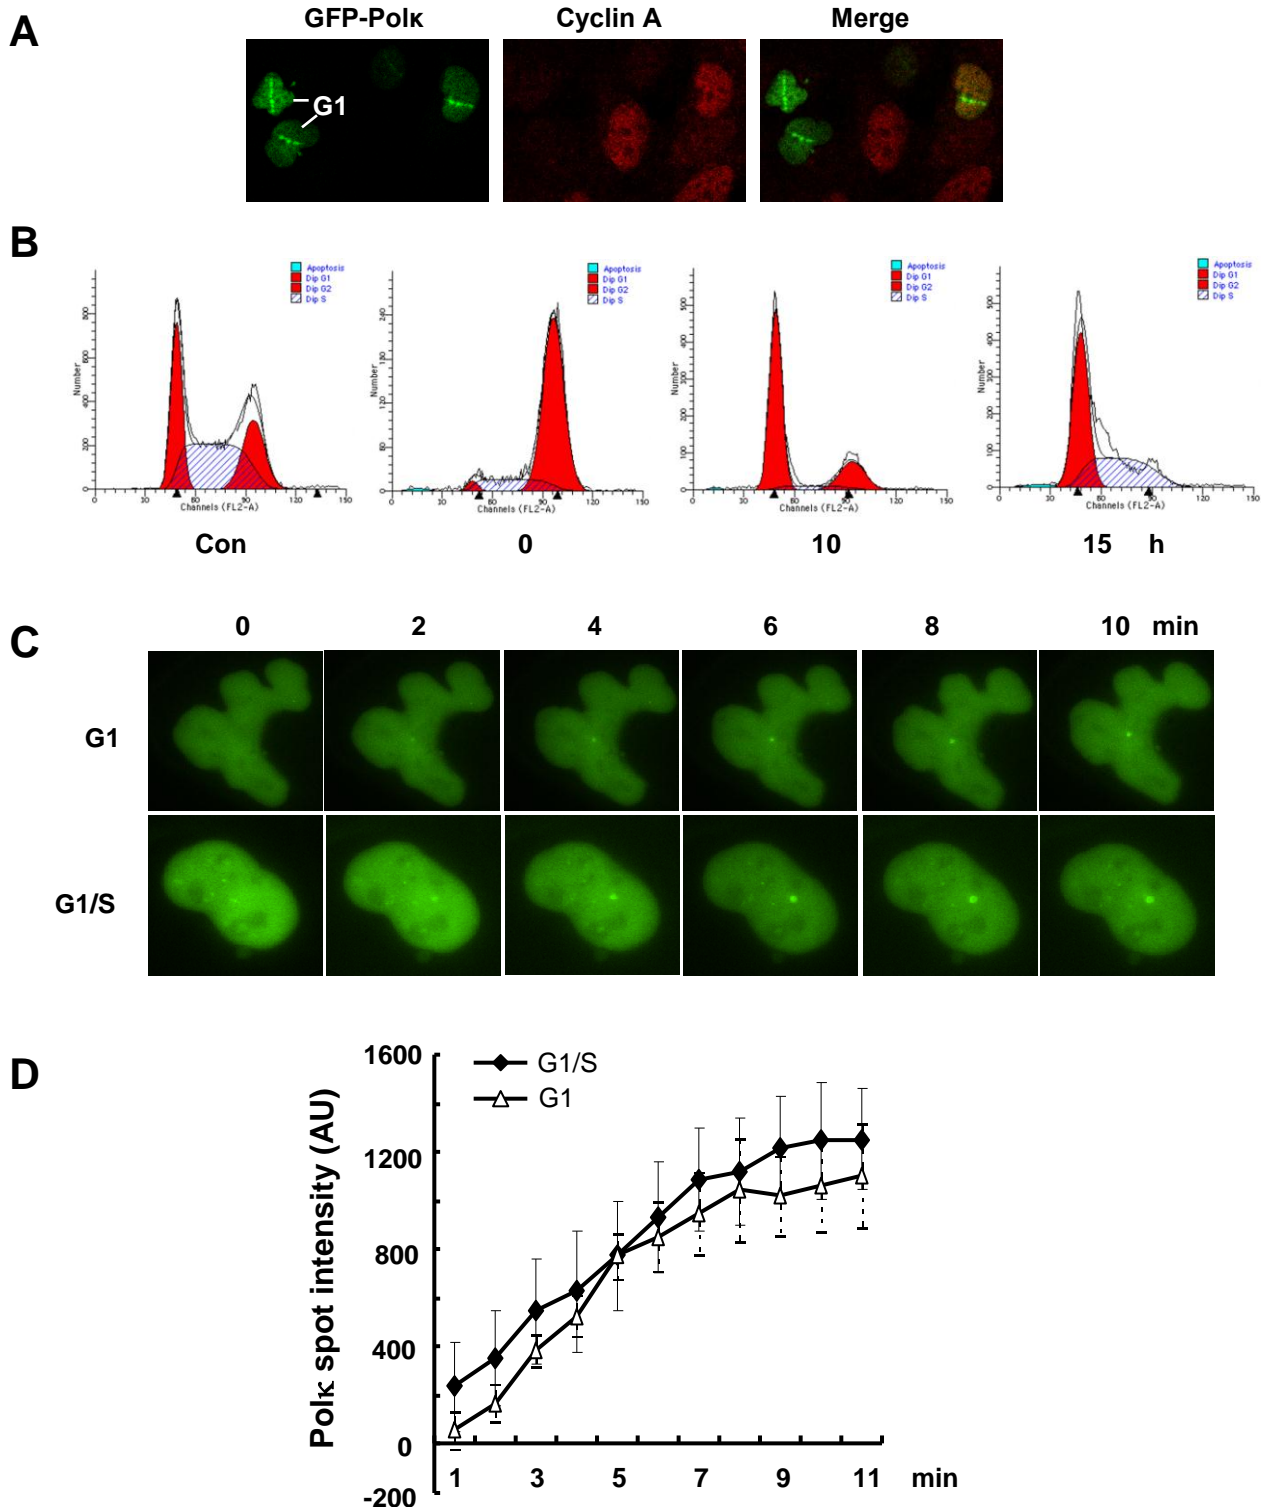

Supplementary Fig.2. Polk enrichment at laser-induced sites of damage was independent of ongoing DNA replication. (A) Polk accumulation at laser-induced sites of damage could be detected in G1-phase cells. MRC5 cells expressing GFP-Polk were micro-irradiated with laser and 40 min later immunostained with antibodies to cyclin A (a marker of S and G2 phases). (B) U2OS cells transfected with GFP-Polk were synchronized to G2/M phase by treatment with nocodazole (50 ng/ml) for about 15.5 h. Then the cells were released from the block ( $t = 0$ ) and harvested at different time points. The cell cycle phase distribution was analyzed. (C) & (D) Cells at 10 h and 15 h after release were irradiated with a UVA laser. The images were recorded at the indicated time points (C) and the recruitment kinetics of Polk in these cells was compared (D).
